1  
2  
3  
4  
5  
6  
7  
8  
9  
10  
11  
12  
13  
14  
15  
16  
17  
18  
19  
20

# Deriving time-concordant event cascades from gene expression data: A case study for Drug- Induced Liver Injury (DILI)

Anika Liu<sup>1,2,3\*</sup>, Namshik Han<sup>1</sup>, Jordi Munoz-Muriedas<sup>2</sup>, Andreas Bender<sup>3\*</sup>

<sup>1</sup> Milner Therapeutics Institute, University of Cambridge, Cambridge, United Kingdom

<sup>2</sup> Systems Modelling and Translational Biology, Data and Computational Sciences, GSK, London, United Kingdom

<sup>3</sup> Centre for Molecular Informatics, Department of Chemistry, University of Cambridge, Cambridge, United Kingdom

<sup>4</sup> Cambridge Centre for AI in Medicine, Department of Applied Mathematics and Theoretical Physics, University of Cambridge, Cambridge, United Kingdom

\*Corresponding author  
E-mail: [ab454@cam.ac.uk](mailto:ab454@cam.ac.uk) (AB), [al862@cam.ac.uk](mailto:al862@cam.ac.uk) (AL)

## 21 **Abstract**

22 Adverse event pathogenesis is often a complex process which compromises multiple events ranging  
23 from the molecular to the phenotypic level. Adverse Outcome Pathways (AOPs) aim to formalize this  
24 as temporal sequences of events, in which event relationships should be supported by causal  
25 evidence according to the tailored Bradford-Hill criteria. One of the criteria is whether events are  
26 consistently observed in a certain temporal order and, in this work, we study this time concordance  
27 between gene expression- and histopathology-derived events as data-driven means to generate  
28 hypotheses on potentially causal mechanisms. As a case study, we analysed liver data from repeat-  
29 dose studies in rats from the TG-GATEs database which comprises measurements across eight  
30 timepoints, ranging from 3 hours to 4 weeks post-treatment. We identified time concordant pathway-  
31 and transcription factor (TF)- level events preceding adverse histopathology, which serves as  
32 surrogate readout for Drug-Induced Liver Injury (DILI). Among known events in DILI, we found some  
33 to change strongly before adverse histopathology, e.g. fatty acid beta oxidation, while others were  
34 more confident, e.g. bile acid recycling, or frequent, e.g. ATF4-mediated stress response, further  
35 characterizing their mechanistic roles. Moreover, we used the temporal order of TF expression and  
36 regulon activity to separate induced TFs, such as Cebpa, from post-transcriptionally activated ones,  
37 e.g. Srebf2, and subsequently combined this with known functional interactions (TF-target or protein-  
38 protein) to derive detailed gene-regulatory mechanisms, such as Hnf4a-dependent Cebpa  
39 expression. We additionally evaluate which time concordant events show sustained or increasing  
40 activation over time, as this time dependence is favourable for biomarker development, and identify  
41 pathways indicating dyslipidaemia, and a decrease in Hnf1a and Hnf4a indicating deteriorating liver  
42 function. At the same, time also potentially novel events are identified such as Sox13 which shows a  
43 more significant time dependence and -concordance than many known TFs in liver injury. Overall, we  
44 demonstrate how time-resolved transcriptomics can derive and support mechanistic hypotheses by  
45 quantifying time concordance and how this can be combined with prior causal knowledge, with the

46 aim of both understanding mechanisms of toxicity, as well as potential applications to the AOP  
47 framework. We make our results available in the form of a Shiny app  
48 ([https://github.com/anikaliu/DILICascades\\_App](https://github.com/anikaliu/DILICascades_App)), which allows users to query events of interest in  
49 more detail.

## 50 **Author Summary**

51 One key challenge in statistical analysis is to infer causation instead of correlation, in particular in  
52 case of observational data. The conserved temporal order of events, their time concordance, is  
53 thereby one potential source of evidence and consequentially time-series data is particularly suited  
54 to study causal mechanisms. In this study, we present an automatable framework to quantify and  
55 characterize time concordance across a large set of time-series, and we apply this concept to gene-  
56 expression- and histopathology-derived events derived from the TG-GATEs *in vivo* liver data as a  
57 case study. We were able to recover known events involved in the pathogenesis of Drug-Induced  
58 Liver Injury (DILI), and identify potentially novel pathway and transcription factors (TFs) which precede  
59 adverse histopathology. As complementary sources of evidence for causality, we additionally show  
60 how time concordance and prior knowledge on plausible interactions between TFs can be combined  
61 to derive causal hypotheses on the TFs' mode of regulation and interaction partners. Overall, the  
62 results derived in our case study can serve as valuable hypothesis-free starting points for the  
63 development of Adverse Outcome Pathways for DILI, and demonstrate that our approach provides a  
64 novel angle to prioritize mechanistically relevant events.

## 65 **Introduction**

66 Adverse drug reactions are a major reason for compound failure in the clinical trials [1,2] and the  
67 significant cause for post-marketing withdrawals. To counter exposing patients to these risks, it is  
68 desired to identify adverse events earlier in the individual patient but also in the drug development

69 process. Mechanistic understanding of how adverse event pathogenesis is crucial in this regard, i.e.  
70 to derive early safety biomarkers or *in vitro* assays. However, current understanding of toxicity is  
71 largely incomplete, in particular for complex phenotypes such as organ injury which can usually be  
72 caused by a wide range of compounds perturbing the biological system at different points mediated  
73 through multiple biological scales and entities [3,4].

74 Multiple interrelated concepts have been introduced to formalize mechanistic knowledge in the  
75 context of toxicity including Adverse Outcome Pathways, AOPs [4,5]. These begin with a molecular  
76 initiating event (MIE) which describes the first interaction of the compound with the system, e.g. a  
77 target protein, which is then linked to the AE through a causal cascade of key events (KEs) on different  
78 biological levels, like activation of cellular pathways or changes in the tissue or organ. Thereby, the  
79 Organization for Economic Co-operation and Development [6] published three criteria to evaluate  
80 causality between events within AOPs based on the original Bradford Hill considerations in the context  
81 of epidemiological studies [7] and previous work on the related Mode of Action concept [8]: Biological  
82 plausibility, essentiality of key events and empirical support for key event relationships. Empirical  
83 support is further separated into time concordance (Event A happens before event B), dose  
84 concordance (Event A happens at lower dose than event B) and incidence concordance (The  
85 magnitude of event A is larger than that of event B).

86 Computational approaches can thereby support these predominantly expert- and knowledge-driven  
87 mechanistic efforts by prioritizing mechanistically relevant events or by providing additional insight on  
88 the relation between an event and a given phenotype. For instance, computationally predicted AOPs  
89 (cpAOPs) prioritize plausible events and event relationships as starting points for expert-driven AOP  
90 development by integrating functional and statistical associations between biological entities on  
91 different levels [9–11]. In contrast, probabilistic quantitative AOPs (qAOPs) provide additional insight  
92 on the predictivity of KERs by aiming to predict the adverse event from *in vitro* assays implementing  
93 the expert-curated AOP as scaffold [12,13]. Biological readouts, such as transcriptomics, are

94 particularly suited to study intermediate key events as they provide broad insights into cellular  
95 changes which can then lead to the identification of predictive signatures and mechanistically relevant  
96 insights, for example in the context of DILI [14–18]. This included studies on the time (and dose)  
97 dependence of gene expression-derived events in the context of adverse findings [19,20], so the  
98 changes of individual events across changes in time (and dose), and also aimed to predict later  
99 adverse findings from fixed early timepoints [14,15]. In contrast, time concordance, which instead  
100 aims to identify the order of activation between two events, has not been explored so far as a means  
101 to derive mechanistic events and event relationships from gene expression data.

102 In this study, we hence quantify time concordance across gene expression- derived cellular events  
103 and adverse events based on histopathology across wide range of compounds. To do so, we  
104 introduce the concept of “first activation” for mechanistic analysis, which focusses only on the earliest  
105 timepoint an event can be reliably detected and then orders events within a time-series by their  
106 timepoint of first activation (Fig 1A). In contrast to previous time concordance analyses in AOPs which  
107 addressed a defined set of KER and known KE [21–23], this analysis derives statistical evidence for  
108 temporal concordance across time-series and can do so for any combination of events based on gene  
109 expression or histopathology. Although the confidence of these temporal orders per time series is  
110 limited by the noisiness of gene expression data and the low time resolution, statistical significance  
111 can be evaluated across time series (Fig 1B). Furthermore, it is possible to separate out events which  
112 depict general perturbation response but are unspecific, as well as rare events, which are predictive  
113 but only observed for a small subset of compounds.

### A) Time concordance and -dependence of events A-D with respect to a later event within a single time-series

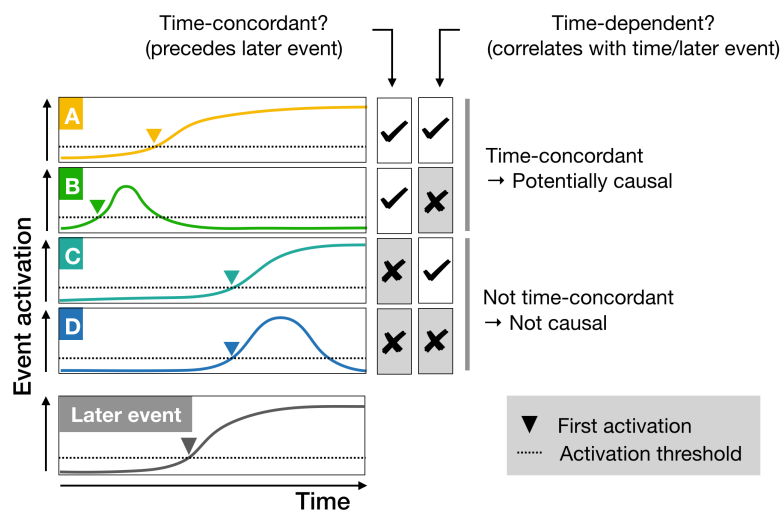

### B) Evaluating time concordance across multiple time series

Time concordance contingency table summarising multiple time series

|                                 | A observed              | A not observed               |
|---------------------------------|-------------------------|------------------------------|
| Before or at the same time as B | $A \rightarrow B$<br>TP | $\neg A \rightarrow B$<br>FN |
| Without B                       | $A \& \neg B$<br>FP     | $\neg A \& \neg B$<br>TN     |

A: Potential preceding event  
B: Potential later event

#### Time concordance metrics for $A \rightarrow B$

Significance (p-value),  
True Positive Rate (TPR),  
Positive Predictive Value (PPV),  
...

114

115 **Fig 1 Quantifying time concordance based on first activation.** (A) The event activation of the  
116 events A-D and the later event is shown over time, as well as their timepoint of first activation,  
117 at which the event first passes the defined activation criteria. If an event takes place before a defined  
118 later event, which in our study is adverse histopathology, it is time-concordant. Time concordance  
119 indicates that there is potentially a causal relation between both events, and is distinct from time-  
120 dependence which is defined based on the correlation to the later event or time. (B) Based on the  
121 frequency of an event before or at the same time as the later event and its frequency in background  
122 time-series without the later event, a confusion matrix and different time concordance metrics can be  
123 derived.

124 We demonstrate the utility of this concept in this work using liver gene expression and histopathology  
125 data from repeat-dose studies in rats provided by the TG-GATEs database. This allows us to take  
126 advantage of previous data curation and work on the dataset itself, in particular by Sutherland et al.  
127 [15] who provide an adverse classification of each compound-dose combination and toxscores  
128 summarising histopathological findings in each condition. Furthermore, Drug-Induced Liver Injury  
129 (DILI) is well understood in comparison to other organ-level toxicities and we hence know which  
130 processes are expected to precede injury, including cell death, inflammation and other adaptive stress  
131 responses [24].

132 We first describe the time concordance for known processes, similar to mechanistic qAOPs, and then  
133 prioritize predictive, time-concordant KE providing a strong data-driven, automatable starting point for  
134 AOP development, aligning with the objective of cpAOPs (more detailed comparison in S1 Table).

135 We then combine data-driven time concordance and prior knowledge on event relations between  
136 transcription factors (TFs) and gene expression to generate hypothesis for causal gene-regulatory  
137 mechanisms in DILI pathogenesis and to generally show how time concordance can stratify and  
138 support other streams of causal evidence. Overall, we show that time-resolved gene expression and  
139 histopathology data can be used to quantify time concordance across a large set of compounds and  
140 events.

## 141 **Results and Discussion**

### 142 **Adverse histopathological findings and their temporal relation**

143 We firstly evaluated which histopathological findings at which level of magnitude, indicated by  
144 toxscore, were frequently found in the adverse compound-dose combinations (observed in at least 5  
145 out of 40 adverse time series) with at least 50% of findings being in adverse time series. Results for  
146 all annotated findings are displayed in Fig 2A and the identified adverse histopathological findings  
147 include hepatocellular single cell necrosis and biliary hyperplasia at all toxscore thresholds. In  
148 contrast, only some of the three toxscore thresholds (“null”, “low”, “high”) were selected with the above  
149 criteria for all other findings, e.g. the two higher toxscore cut-offs for hepatocellular necrosis and  
150 inflammation and only the “high” cut-off for increased hepatocellular mitosis. In all cases, the lower  
151 toxscore level was also frequently observed in non-adverse conditions and hence considered too  
152 unspecific. In contrast, only the two milder levels of fibrosis were included in the selection, as severe  
153 fibrosis was observed rarely.

154 For the adverse histopathology labels, the distribution of toxscores and first activation over time (Fig  
155 2B) shows that some findings are predominantly found late, like fibrosis, while others are  
156 predominantly found early, e.g. hepatocellular single cell necrosis. This indicates that a further  
157 progressed and more severe phenotype tends to be annotated with different terminology. These

158 adverse histopathology labels were next used to define 61 time-series associated with any of the  
 159 given histological changes, covering 38 compounds, as adverse (S2 Table). In those, the earliest  
 160 evidence of an adverse phenotype is used to approximate the timepoint of the primary insult. From  
 161 this analysis, across all timeseries with adverse histopathology, we find that hepatocellular single cell  
 162 necrosis is most frequently the primary insult, while biliary hyperplasia at any severity is in most cases  
 163 a secondary effect (Fig 2C, S2 Fig). Furthermore, higher doses are generally found to induce earlier,  
 164 and more severe, changes across all findings. We additionally investigated for all histopathology  
 165 labels how frequently these were observed before or after the primary insult, and for example find  
 166 vascular edema exclusively before or at the primary insult, and hepatocellular hypertrophy most  
 167 frequently afterwards (for details see S2 Fig).

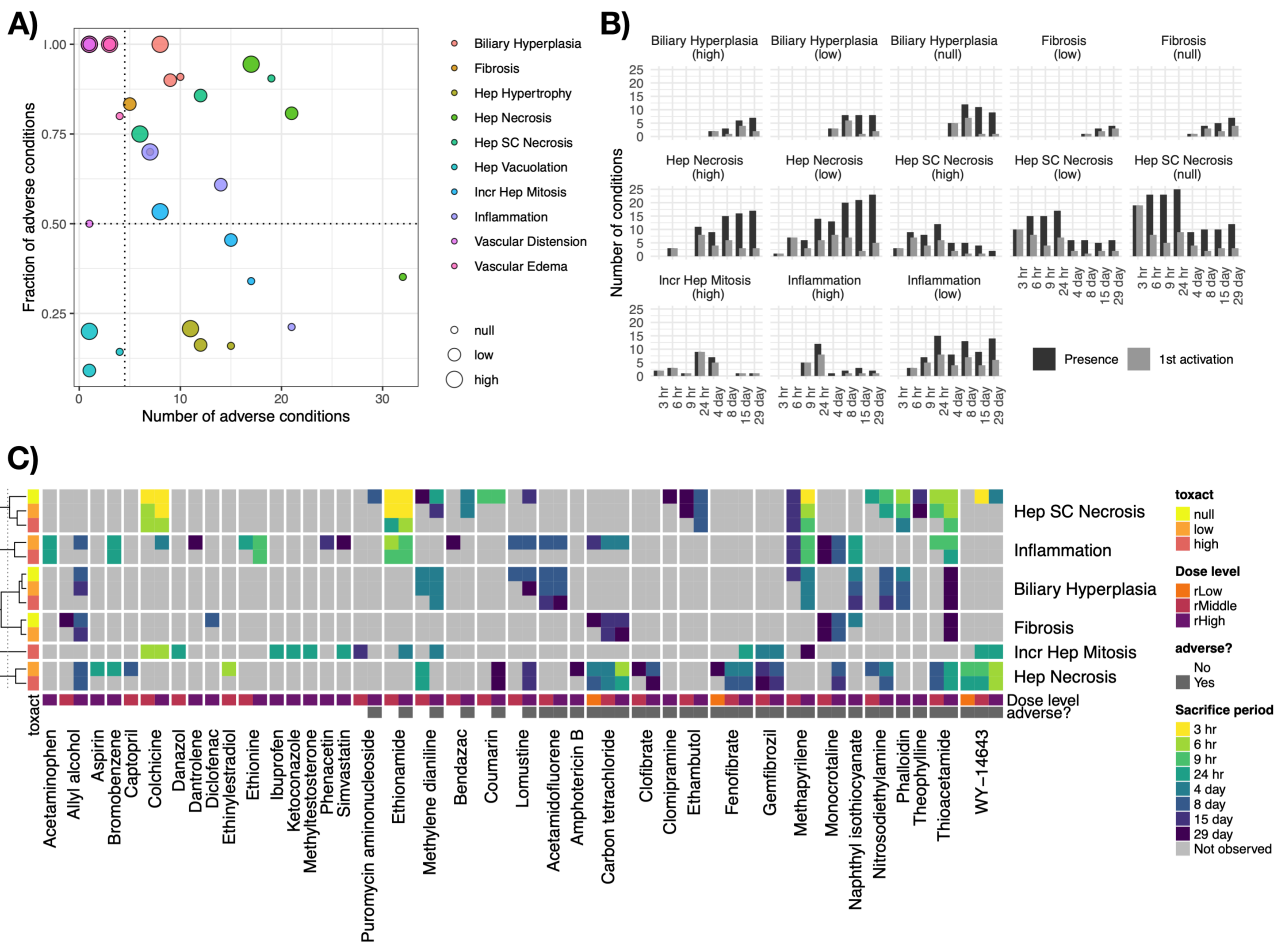

168



169 **Fig 2: Distribution and relation of histopathological findings across time series.** A) Number of  
170 occurrences in adverse time series and the fraction of adverse time series among all occurrences of  
171 the given finding for all histopathological findings at 3 different toxscore cut-offs, namely “null”  
172 (toxscore>0), “low” (toxscore>0.67) and “high” (toxscore>1.34). Histopathological findings, out of  
173 which at least 50% and at least 5 of the occurrences were found in adverse conditions timeseries  
174 were considered adverse B) Frequency of histopathological findings at different timepoints, as well  
175 as the frequency of the respective first activations C) Time of first activation across timeseries labelled  
176 as adverse or non-adverse.

## 177 **Known pathways in DILI preceding adverse histopathology**

178 To identify time-concordant cellular changes preceding later adverse histopathology, we next defined  
179 the up- or downregulation TFs or pathways as events and identified 911 significantly enriched (p-  
180 value<0.05) pathway-level events (37.3%), and 108 TF-level events (33.6%). The high number of  
181 significant events is a result of the overall larger dysregulation observed in adverse time series. We  
182 next evaluated time concordance for a set of ten known events in DILI (S3 Table). Recycling of bile  
183 acids and salts is the most significantly enriched geneset among the ones linked to known events and  
184 overall (Fig 3). Also down-regulation of the other bile acid gene sets is significantly enriched (p-value  
185 < 0.05) pointing to an overall down-regulation of bile acid metabolism. While cell death is also only  
186 found to be up-regulated, dysregulation in both directions is found to precede injury for all other key  
187 events (Fig 3). However, only for peroxisomal processes, namely peroxisomal protein import and  
188 beta-oxidation of very long fatty acids, both directions were significantly enriched indicating that  
189 dysregulation in either direction might be linked to injury. Overall, significantly enriched gene sets are  
190 found for all represented known events in DILI (p-value < 0.05) indicating that our analysis is able to  
191 recover known cellular events.

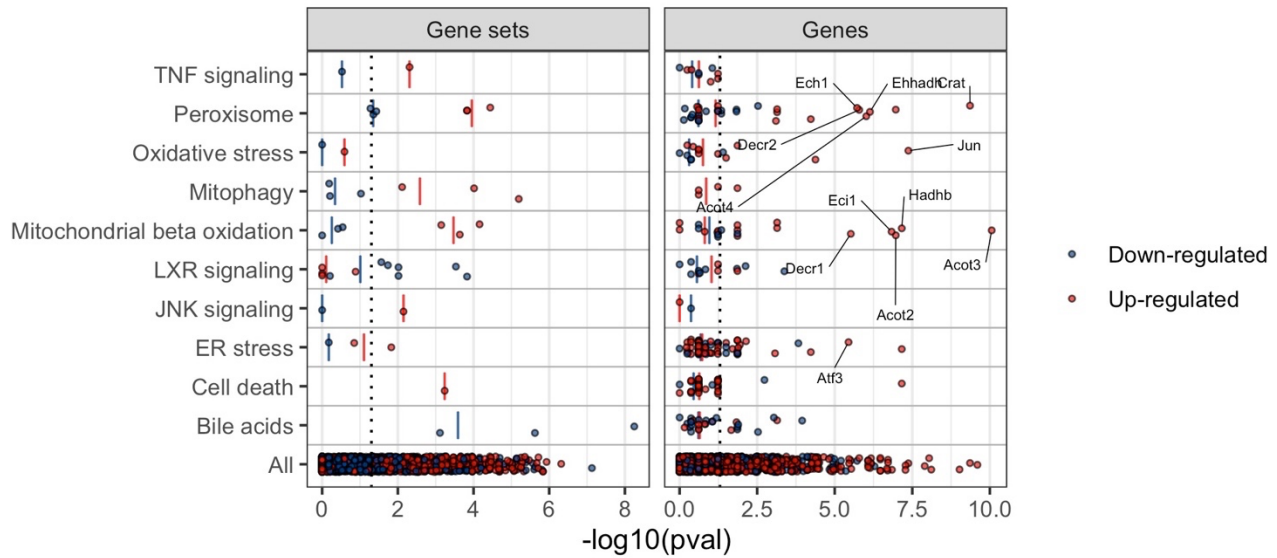

192

193 **Fig 3: Enrichment of known events in DILI before adverse histopathology based on gene sets**  
 194 **as well as individual gene members.** The enrichment of first activation before or at adverse  
 195 histopathology is shown for gene sets mapping to known key events in DILI and genes in these gene  
 196 sets. Aligning with the expected direction, a significant down-regulation of LXR signalling and bile  
 197 acid-related pathways is observed, while all other gene sets were found to be more significantly up-  
 198 regulated. Only for peroxisomal pathways, both directions were significantly enriched indicating that  
 199 dysregulation in direction might be linked to adverse histopathology. Furthermore, we show which  
 200 genes show significantly enriched and strong ( $|\log_{2}FC| > 1$ ) dysregulation providing additional insight  
 201 into the processes. Among others, Acyl-CoA thioesterase 3 (*Acot3*), which is involved in mitochondrial  
 202 beta oxidation, is identified as overall most significantly enriched gene.

203 We next analysed the enrichment of significantly and strongly ( $|\log_{2}FC| > 1$ ) dysregulated individual  
 204 genes from the above gene set, with the hypothesis in mind that such genes might be able to provide  
 205 insight on a more detailed level (S2 File). Among the ten most significantly enriched gene-level events,  
 206 three are involved in known processes, namely the up-regulation of Acyl-CoA thioesterase 3 (*Acot3*)  
 207 and Carnitine O-Acetyltransferase (*Crat*) which are involved in mitochondrial and peroxisomal beta  
 208 oxidation, respectively, as well as the Jun Proto-Oncogene (*Jun*) which plays a role in oxidative stress.  
 209 All of the other genes among the ten most significantly enriched gene-level events are also involved  
 210 in mitochondrial and peroxisomal processes except Growth Arrest And DNA Damage-Inducible  
 211 Protein *Gadd45a* which has a known role in hepatic fibrosis [25]. For JNK signalling, we did not find  
 212 any significantly enriched genes indicating that while the overall process is changing none of the  
 213 individual genes shows strong and frequent expression changes. This shows that both gene- and

214 gene-set level analysis can provide complementary insights into cellular changes preceding DILI, and  
215 that in some cases effects can be attributed in individual genes which might give more detailed  
216 information about the cellular changes.

217 While significant enrichment before or at adverse histopathology can be regarded as a necessary  
218 criterion for time concordance, the temporal event relationship can be further characterised based on  
219 the observed behaviour across experimental conditions which may be useful to further prioritize  
220 mechanistically relevant pathways in a hypothesis-free manner. Following the Bradford-Hill  
221 considerations, we hypothesize that this might be the case for observed effect size, frequency and  
222 specificity of event occurrence before adverse histopathology. Firstly, we investigated how strongly  
223 pathways were dysregulated comparing the maximal  $|\log\text{FC}|$  per adverse time-series (Fig 4). High  
224 median max.  $|\log\text{FC}|$ s were overall found for mitochondrial and peroxisomal pathways and the highest  
225 median max.  $|\log\text{FC}|$  among all significant events was found for mitochondrial fatty acid oxidation of  
226 unsaturated fatty acids. At the same time, however, the high variance for pathways with high median  
227 max.  $|\log\text{FC}|$  as well as the only moderately high  $|\log\text{FC}|$ s observed for other known pathways in DILI,  
228 such as programmed cell death. This indicates that a high magnitude of  $|\log\text{FC}|$  is not necessary to  
229 contribute to an adverse event, but at the same time can be a useful property to further prioritize  
230 important pathways.

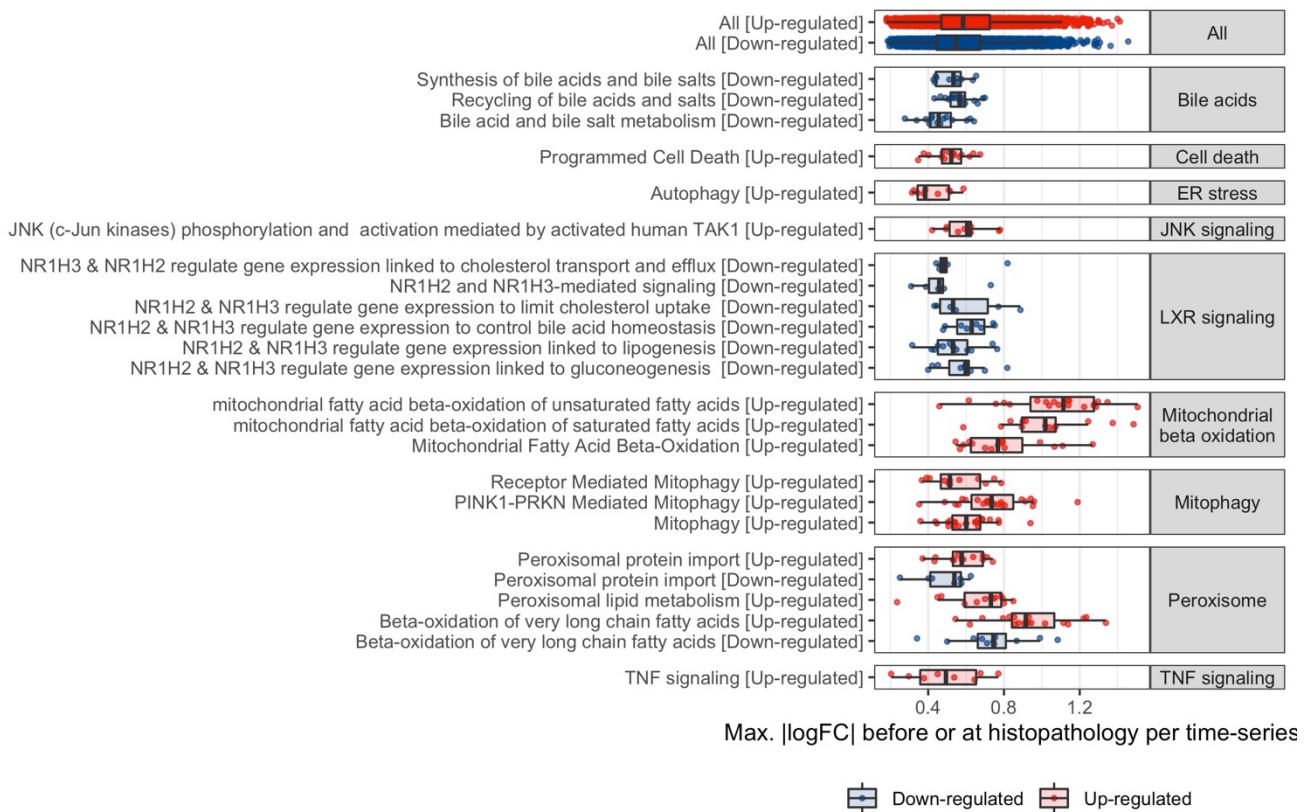

231

232 **Fig 4: Observed max. |logFC| before adverse histopathology.** For known processes in DILI which  
 233 correspond to significantly enriched events before adverse histopathology, the max |logFC| before  
 234 adverse histopathology is shown. A high logFC is found for mitochondrial beta oxidation and followed  
 235 by peroxisomal beta oxidation and mitophagy. As reference, also the background distribution of all  
 236 max. |logFCs| is shown.

237 We next analysed to what extent dysregulation in a pathway is predictive for a particular type of  
 238 histopathology. To this end, we calculated across how many adverse time-series each pathway is  
 239 observed, summarised by the true positive rate (TPR), and the positive predictive value (PPV)  
 240 indicating whether presence of the key event is a confident indicator for the later adverse event (Fig  
 241 5). We focus on significantly enriched events only ( $p$ -value < 0.05) and find a trade-off with respect to  
 242 the highest TPR and PPV (Fig 5; for distribution of all events see S3 Fig). This generally shows that  
 243 either highly frequent events with lower specificity can be identified or more specific events at the  
 244 expense of lower frequency. Thereby, known events are found at both sides of the spectrum, with  
 245 increased mitophagy being the most frequent known event (TPR: 0.41, PPV: 0.72) and bile acid  
 246 recycling the most frequent event among those which are also highly confident (TPR= 0.30, PPV:1).

247 Surprisingly, lower frequencies are particularly observed for stress response and signaling pathways  
 248 with only LXR-dependent gene expression linked to lipogenesis reaching a TPR over 20%. We argue  
 249 that one cause for lower observed frequencies is that these pathways are predominantly and initially  
 250 mediated through post-transcriptional alterations instead of gene expression changes, making the  
 251 expression of pathway members a weak proxy for pathway activation in early pathogenesis and  
 252 explaining the overall low frequencies. In fact, one reason LXR-dependent changes might have  
 253 achieved higher frequencies as they explicitly include the downstream regulated genes unlike the  
 254 other signalling and stress response pathways. We hence next investigated the activity of known TFs  
 255 in DILI preceding adverse histopathology, which might better describe early perturbation response  
 256 preceding downstream gene expression changes.

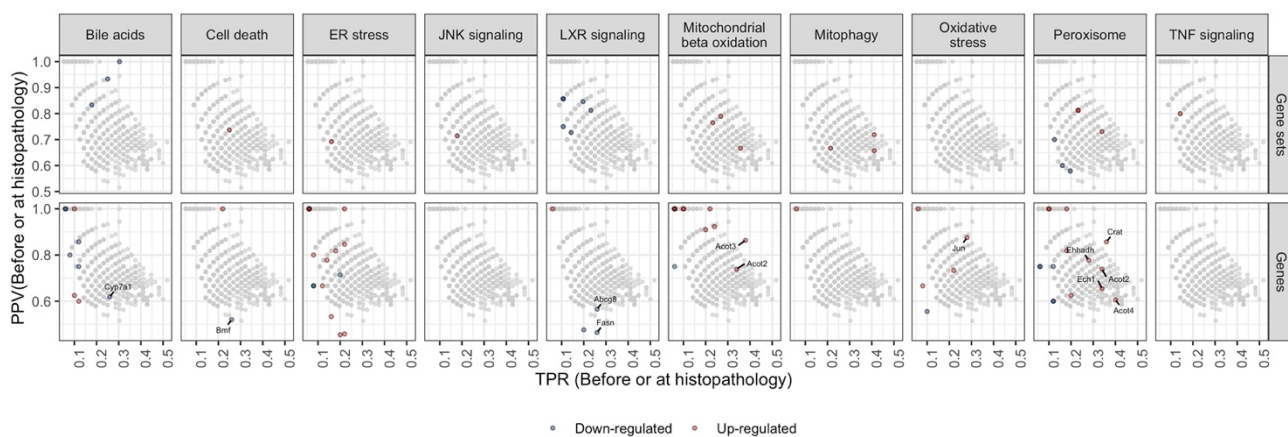

257

258 **Fig 5: True positive rate (TPR) and positive predictive value (PPV) before or at histopathology**  
 259 **of genes and gene sets in known key events in DILI.** Events related to the given known key event  
 260 are shown in red or blue indicating an up- or downregulation, respectively. If the event was over-  
 261 represented before adverse histopathology ( $p$ -value < 0.05) the point was additionally circled in black.  
 262 The background distribution of all genes or gene sets is shown in grey.

## 263 Known TFs in DILI preceding adverse histopathology

264 To gain insight into signalling and expression regulation preceding adverse histopathology, we next  
 265 looked into known TFs mediating the stress response and signalling pathways already introduced  
 266 above, as well as nuclear receptors which take in important roles in liver physiology and malfunctions

267 and can be, both, MIEs or KEs (mapping shown in Fig 6A). Consistent with the pathway-level results,  
268 an enriched up-regulation is found for Nuclear factor erythroid 2-related factor 2 (Nfe2l2) which is a  
269 key mediator of oxidative stress [18,26] as well as the Nf- $\kappa$ B subunits RelA and Nfkb1 indicating  
270 inflammation [27], while the Oxysterols Receptors LXR $\alpha$  (Nr1h3) and LXR $\beta$  (Nr1h2) which control  
271 lipid metabolism showed enriched down-regulation [28].

272 For ER stress, we included three TFs mapping to the three branches of unfolded protein response  
273 [29]: Activating transcription factor 4 (Atf4), Activating transcription factor 6 (Atf6) and X-box binding  
274 protein 1 (Xbp1). Atf4 up-regulation was found to be most significantly enriched, most frequent and  
275 also showing the largest logFC. This highlights its overall importance in mediating ER stress and is  
276 consistent with the known role for ATF4 in DILI [30]. While Atf4 is a member of the pro-apoptotic  
277 unfolded protein response branch, the ATF6 and XBP1-mediated branches tend to be cytoprotective  
278 [31]. In agreement with this, Atf6 was not significantly enriched, however, Xbp1 showed rare but  
279 significantly enriched down-regulation.

280 Transcription Factor AP-1 (Jun) which is one of downstream target TFs of JNK signaling was not  
281 significantly enriched in either direction due its rare activation among adverse time series although  
282 JNK signaling up-regulation itself was significantly enriched with *Jun* up-regulation being one of the  
283 most significantly enriched gene-level events. However, JNK signaling is particularly known in  
284 acetaminophen-induced liver injury and in this context leads to hepatocyte death through interactions  
285 with Sab on the mitochondrial outer membrane and not through transcriptional regulation mediated  
286 by AP-1 [32,33]. As increased Jun activity is hence known to be a consequence of JNK signaling but  
287 not a cause of injury, it would be plausible to see enriched pathway activity but not in TF activity before  
288 adverse histopathology.

289 Overall, we were able to show significant enrichment of some of the known TFs in DILI before adverse  
290 histopathology and can also biologically reason the absence of significance for others. While none of  
291 the included TF-level events ranked as most significant or most strongly changing before adverse

292 histopathology as in the analysis of pathway-level events, the down-regulation of Nr1h3, which is  
 293 involved in lipid metabolism, was identified as most frequent event indicating that the linked  
 294 physiological changes are commonly but not specifically found before injury. Similarly, the up-  
 295 regulation of stress response, indicated by Nfe2l2 and Atf4, was found to be frequent aligning with  
 296 their role in adaptive stress response [34]. Overall, frequency might hence be a useful metric to  
 297 identify pre-adverse cellular events which precede injury but are not highly specific.

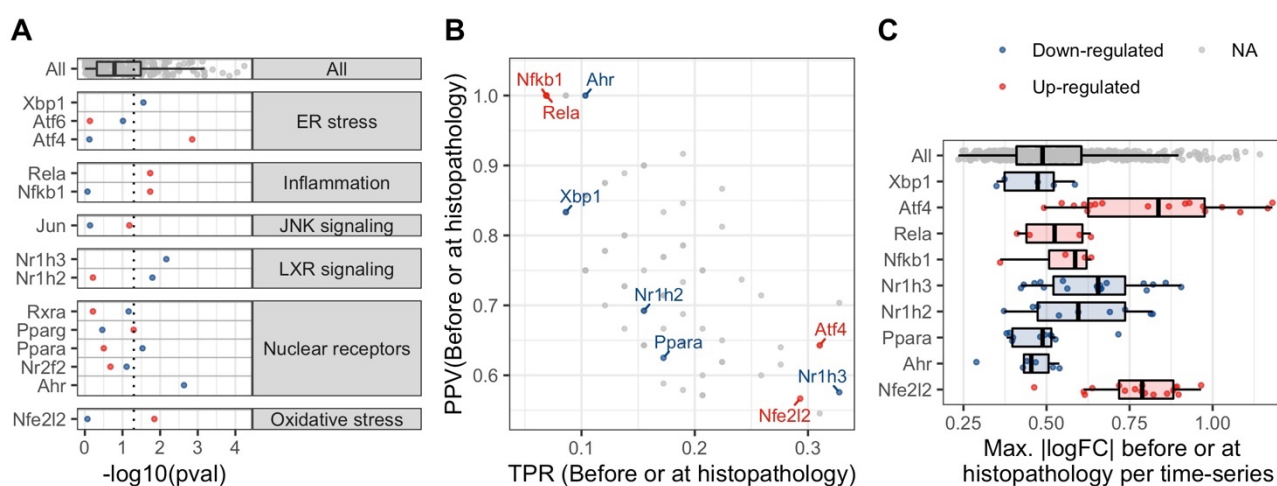

298

299 **Fig 6: Temporal concordance of nuclear receptors and adaptive response transcription factors**  
 300 **(TFs) in DILI.** For known TFs in DILI the following time concordance metrics are shown: A) The  
 301 enrichment significance before or at first adverse histopathology, B) Positive Predictive Value (PPV)  
 302 and True Positive Rate (TPR), C) Max. mean |logFC| before or at first adverse histopathology.

### 303 Data-driven prioritization of cellular events taking place before adverse 304 histopathology

305 As many events were found to be significantly enriched before adverse histopathology, we next aimed  
 306 at identifying and characterizing events most supported by time concordance, and hence to move  
 307 closer to the eventual aim of constructing AOPs from data (All time concordance metrics in S2 File).  
 308 Among all significant pathway-level events, some known events in DILI ranked highest by enrichment  
 309 p-value while others rank highest by max. |logFC| before adverse histopathology. In contrast, known  
 310 TFs in DILI were found as most frequent ones in the dataset. We hence next looked into the top 10

311 TF- and pathway-level events identified using max.  $|\log FC|$ , the enrichment p-value, and the TPR  
312 before or at adverse histopathology. These are shown in Fig 7 and summarised in S4 Table. The next  
313 most significantly enriched pathway-level event after decreased bile acid and salt recycling was the  
314 down-regulation of glycosaminoglycan metabolism and the most significantly enriched TF-level event  
315 was the down-regulation of Transcription factor activating enhancer binding protein 4 (Tfap4) which  
316 shows emerging roles in cell fate decisions [35]. Among the up-regulated events, the most significant  
317 enrichment is found for cell cycle checkpoints and DNA repair among the pathway-level events as  
318 well as E2F Transcription Factor 2 (E2f2), which controls cellular proliferation and liver regeneration  
319 [36], among the TF-level events. E2f2 up-regulation was also identified as 2<sup>nd</sup> most frequent TF event  
320 after the down-regulation of Nr1h3 and among the top 10 most strongly changing TF events further  
321 highlighting its strong time concordance. The most frequent genesets point to translation regulation  
322 via Eukaryotic translation initiation factor 2A (EIF2a) including the upstream response mediated by  
323 eIF-2-alpha kinase GCN2 and the downstream role in protein translation mediated through  
324 interactions with tRNA. EIF2a is part of the same UPR branch as Atf4 and causes its preferential  
325 translation which, among others, mediates autophagy and proapoptotic response [29,37].  
326 Furthermore, increased folding of actin by Chaperonin containing tailless complex polypeptide 1  
327 (CCT) or tailless complex polypeptide 1 ring complex (TRiC) is found frequently and with large effect  
328 size and has been previously linked to proteostasis and autophagy [38,39]. As most strongly  
329 dysregulated events, metabolic pathways are found pointing to increased beta oxidation, as well as  
330 decreased cholesterol biosynthesis and tyrosine catabolism. Also the Sterol Regulatory Element  
331 Binding Transcription Factors Srebf1 and Srebf2 which control cholesterol biosynthesis, as well as  
332 Nr1h3 which controls Srebf1 expression are among the most strongly down-regulated TFs. Overall,  
333 the derived time concordant events, which take place between the beginning of treatment and onset  
334 of adverse histopathology, hence include known and plausible events in liver injury which can be  
335 further characterized based on their frequency, significance and logFC.



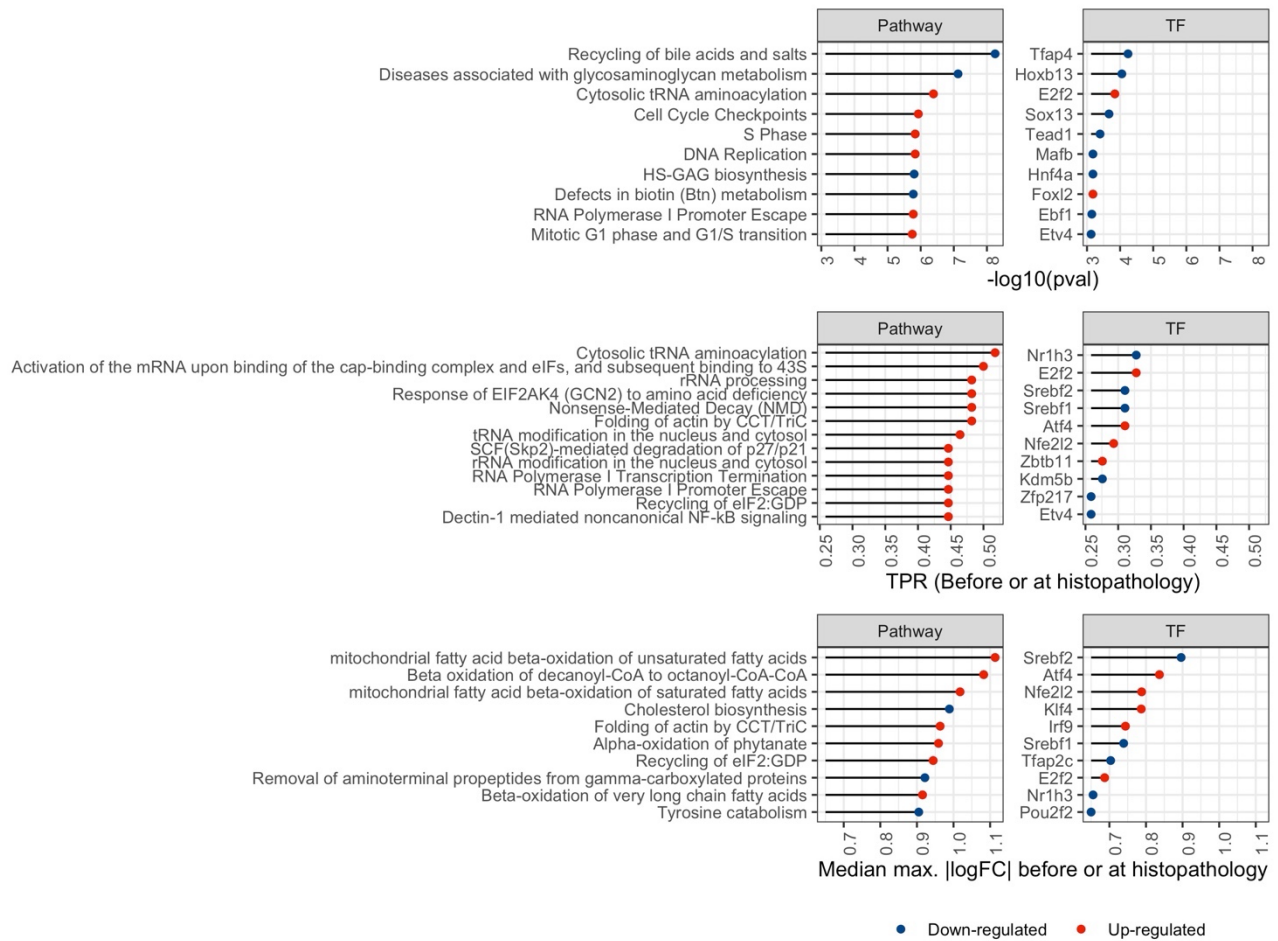

336

337 **Fig 7: Highest ranking events by time concordance metrics.** The 10 transcription factor (TF)- and  
 338 pathway-level events ranking highest by enrichment p-value, median max. |logFC| and true positive  
 339 rate (TPR) before or at histopathology is shown.

340 **Identifying mechanistic hypotheses combining known TF functions and**  
 341 **time concordance**

342 While both pathways and TFs constitute interpretable events in this study, further prior knowledge is  
 343 available on how TFs function on a molecular level allowing us to derive more detailed hypothesis.  
 344 Firstly, TF activity can generally be modulated through changes in expression or in post-transcriptional  
 345 regulation as consequence of cellular signaling or environmental changes. In case of transcriptional  
 346 regulation, changes in mRNA levels should precede changes in TF activity estimated based on  
 347 regulon expression and hence time concordance can be used to gain support for transcriptional TF

348 regulation. Being only interested in TF events with a potential mechanistic link to liver injury, we  
 349 studied how significantly concordant expression and activity for each TF are enriched before adverse  
 350 histopathology (Fig 8A). The strongest evidence for a role in DILI pathogenesis is found for 15 TF  
 351 events which show both significantly enriched TF expression and regulon activity, providing  
 352 complementary evidence of TF importance and hinting at transcriptional regulation. While this is not  
 353 the case for the 77 TF events which only show significantly enriched TF activity, including increased  
 354 E2f2 or Klf4 activity, this can be explained by post-transcriptional regulation potentially describing  
 355 earlier response patterns which are a direct consequence of upstream signaling. In contrast, 33 TF  
 356 events with only significant gene expression, such as increased Jun or Myc, might be already showing  
 357 changes in expression but not sufficiently large changes in activity yet. As this rather indicates a role  
 358 in later pathogenesis and expression is only regarded as supporting evidence, these TFs have not  
 359 been included in downstream analysis.

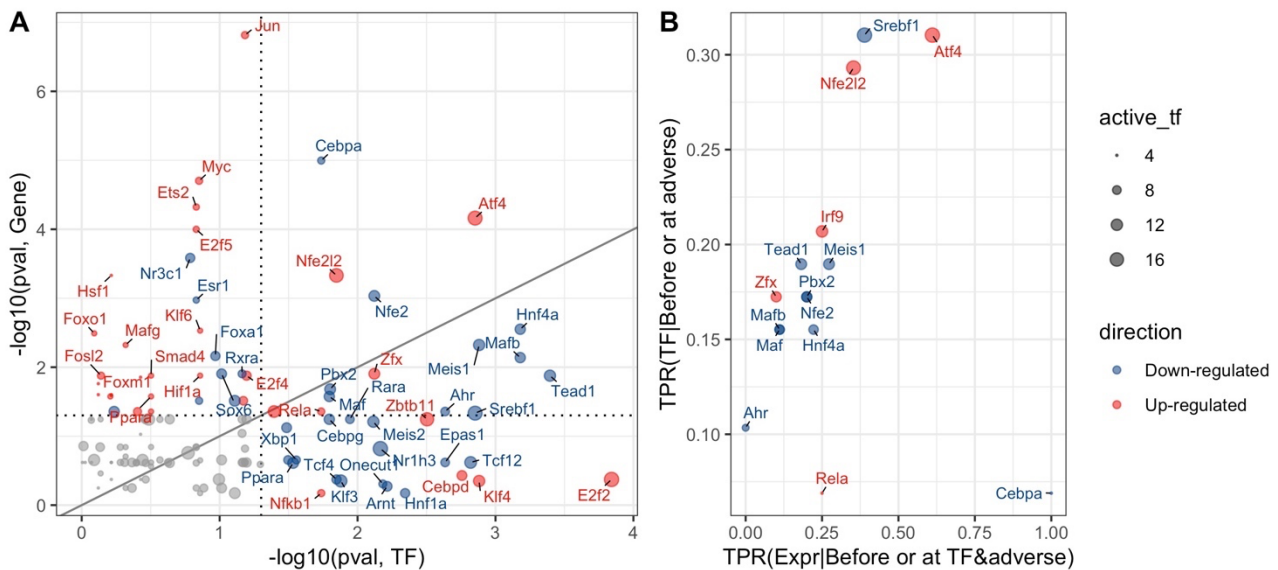

360

361 **Fig 8: Transcription Factor (TF) activity and expression before adverse histopathology. A)**  
 362 **Significance of enrichment in adverse conditions for matched TF activity and expression-**  
 363 **based events. Events only found on the expression or TF level are not included in the figure**

364 **due to the absence of a statistical test for those. B) For significantly enriched TF activity-based**  
365 **events, the frequency of observing expression before TF activity is shown.**

366 As we have seen in Fig 8A, some TFs show significant enrichment before adverse histopathology,  
367 both, on the gene expression and TF activity level. To derive stronger mechanistic evidence for  
368 induction we next evaluated how frequently expression changes precede TF activity in the same  
369 adverse time-series and compare this against the overall frequency of TF event occurrences  
370 preceding adverse histopathology (Fig 8B). Among the events with significant enrichment of TF  
371 expression and activity, the most frequent evidence for induction was found for the down-regulation  
372 of CCAAT/enhancer-binding protein alpha (Cebpa). In humans, decreased CEBPA expression is not  
373 only known across liver diseases, exogenously increased CEBPA expression has also been shown  
374 to reverse liver injury and is explored as therapeutic target in hepatocellular carcinoma [40]. The event  
375 with the 2nd highest relative frequency of expression preceding TF activity as well as the highest  
376 frequency of TF activity preceding injury is ATF4, for which expression is known to be induced as part  
377 of the ER stress response contributing to adverse liver phenotypes [41,42]. In contrast, it was found  
378 that for the Aryl Hydrogen Receptor, Ahr, changes in expression never preceded those in TF activity  
379 providing counterevidence for transcriptional reduction despite significant enrichment of expression  
380 changes preceding injury [43].

381 After investigating the mode of regulation for individual TFs above, we next considered how these  
382 TFs are interlinked. To this end, we identified protein-protein interactions and, for induced TFs, TF-  
383 target gene interactions between significantly enriched TFs which showed significant enrichment  
384 before adverse histopathology for, both, expression and regulon activity as well as evidence of  
385 expression preceding TF activity within the same adverse time series. Results of this analysis are  
386 shown in Fig 9, and details on the observed absolute and relative frequencies, as well as the source  
387 of the interaction are shown in S5 Table. One of the two most frequently identified interaction by  
388 absolute frequency is Nr1h3 down-regulation resulting in reduced Srebf1 activity. Furthermore, Srebf1  
389 is also linked to upstream regulation by Nr1h2 which interacts with Peroxisome Proliferator-Activated

390 Receptor (Ppara) in both directions, and this cross-talk between Ppara and LXR regulating Srebf1  
391 expression has been explicitly studied in the context of fatty acid metabolism regulation [44–46]. The  
392 2<sup>nd</sup> most frequently observed interaction is the down-regulation of Transcription Factor 12 (Tcf12)  
393 inducing reduced activity of TEA Domain Transcription Factor 1 (Tead1). While Tead1 is indeed  
394 known to be involved in liver diseases and injury [47,48] , the interaction itself has not been reported  
395 before in the context of liver injury and the same applies also for the other upstream Tead1 regulators  
396 identified. It should also be noted that for these interactions first activation is only found at the same  
397 time but not in the time-concordant order providing weaker evidence than for example the interaction  
398 between Nr1h3 and Srebf1. As additional larger TF cluster, decreased activity of the Hepatocyte  
399 Nuclear Factor 1 (Hnf1a), Retinoic Acid Receptor alpha (Rara) and Pancreatic And Duodenal  
400 Homeobox 1 (Pdx1) was found to lead to decreased expression and activity of Hepatocyte Nuclear  
401 Factor 14 (Hnf4a) which is linked to reduced expression and activity of CCAAT/enhancer-binding  
402 protein (Cebpa) through edges in both directions. This cluster stands out due to the high confidence  
403 score of all interactions except the edge between Pdx1 and Hnf4a indicating that there is strong  
404 support based on prior knowledge for the involved interactions. Furthermore, it was previously found  
405 that artificially increased expression of Hnf4a is able to reverse hepatic liver failure in rats while also  
406 restoring expression of a highly interconnected TF network including Hnf1a and Cebpa which  
407 supports the identified interactions [49,50]. One of the yet unknown TFs in DILI is Meis Homeobox 1  
408 (Meis1) which is generally known in a developmental context. However, it's down-regulation in early  
409 pathogenesis is supported by enriched TF activity and differential expression before adverse  
410 histopathology as well as upstream regulators which are also enriched before adverse histopathology.

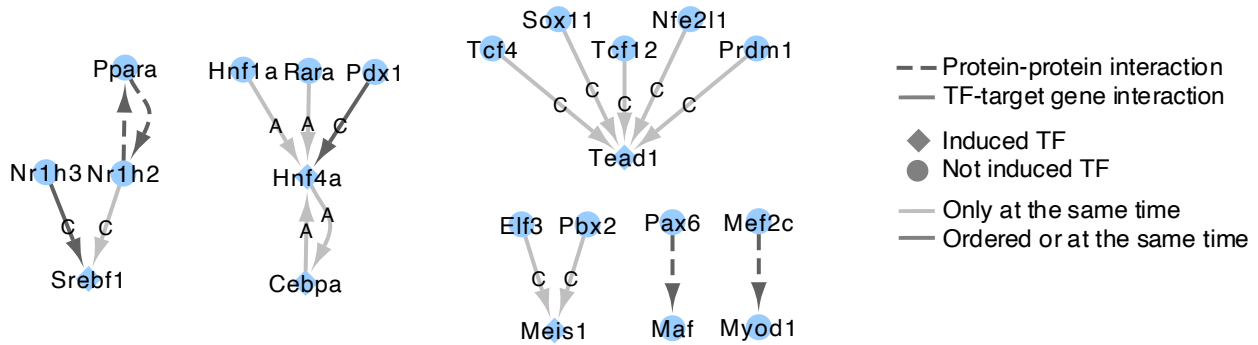

411

412 **Fig 9: Causal relationships between TFs supported by time concordance.** For TFs which are  
 413 significantly enriched before or at adverse histopathology, known causal relations are shown in which  
 414 the upstream event is found before or at the downstream event in at least 20% of adverse cases. For  
 415 induced TFs for which expression is found before regulon activity and significantly enriched, not only  
 416 protein-protein interactions are considered but also upstream TF-target gene interactions annotated  
 417 with DoRothEA confidence scores (A: High confidence, C: Medium confidence). Only interactions  
 418 between down-regulated nodes are found which is indicated by the blue node colour.

### 419 Time-concordant events reflecting disease progression

420 While events do not have to be activated continuously to be causally involved in pathogenesis, events  
 421 with consistent or increasing activation over time are particularly interesting as biomarkers as they  
 422 can be experimentally measured without the chance of missing the timepoint of activation, and can  
 423 potentially reflect disease progression beyond early pathogenesis. We therefore studied which TFs  
 424 and pathways show time-dependent activation by testing for significant Spearman correlation  
 425 between activation logFC and time in adverse time-series, and whether this overlaps with the  
 426 previously derived time concordance (Fig 10). Overall, 118 pathways and 19 TFs were supported by  
 427 both, significant time concordance and dependence, which represents 86.1% or 70.4% of the time  
 428 concordant events, and 59.9% or 48.7% of the time-dependent events, respectively.

429 On the pathway level, multiple genesets pointed to a reduced level plasma lipoprotein particle  
 430 assembly and remodelling indicating changes in lipid distribution. This aligns with the known  
 431 dyslipidaemia in chronic liver diseases, including decreasing serum values of LDL, HDL, total  
 432 cholesterol, and triglycerides with increasing severity of disease, based on which previous studies

433 suggested that routine monitoring of lipid profiles can improve the outcome for CLD patients [51].  
434 Furthermore, a down-regulation of response to metal ions was found which could be related to  
435 metallothioneins which protect against oxidative stress and are able to chelate heavy metals [52].  
436 Both directions of dysregulation were previously observed in liver diseases: While a negative  
437 correlation with disease progression was found in hepatocellular carcinoma [53], a positive correlation  
438 was found in most other liver diseases including acetaminophen-induced liver injury [54]. This  
439 indicates that opposite directionality is more plausible based on current literature knowledge, but  
440 cannot be fully clarified. The most time-concordant and -dependent TF event was down-regulation of  
441 SRY-Box Transcription Factor 13 (Sox13) which is generally involved in cell fate [55] and embryonal  
442 development [56] but does not have well understood functions on a more detailed level. In contrast,  
443 the next most significant time dependence is found for the hepatocyte nuclear factors Hnf1a and  
444 Hnf4a, as well as Cebpa which are known to negatively correlate with liver cirrhosis in rats [57,58].  
445 Overall, this shows that a mechanistic role for time-concordant and -dependent events is strongly  
446 supported by the understanding of adverse liver phenotypes.

### A) Spearman correlation vs. time concordance significance

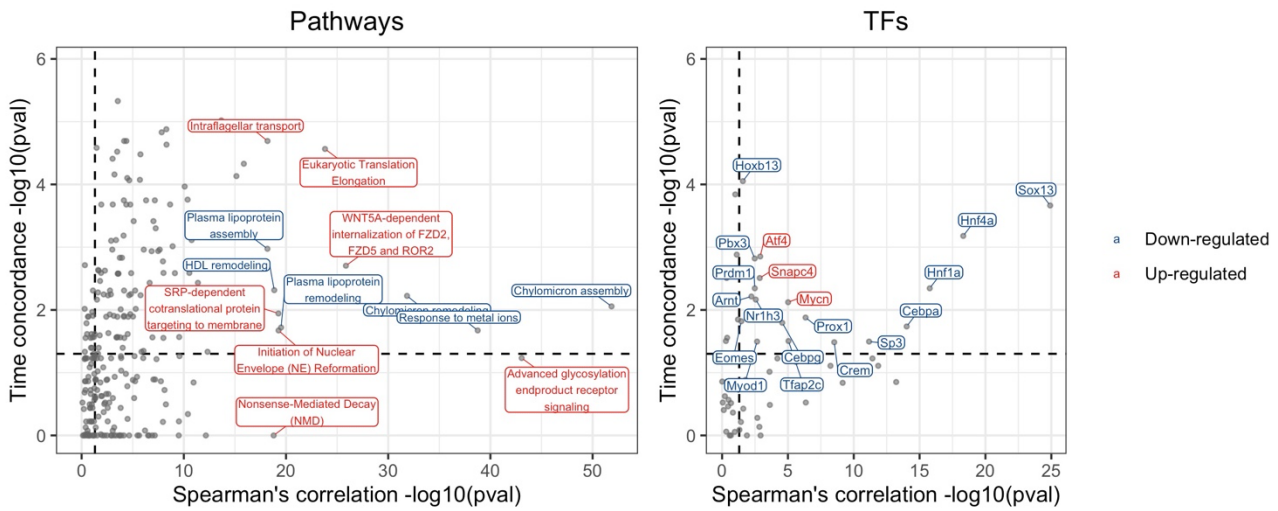

### B) Time-concordant events with most significant Spearman correlation

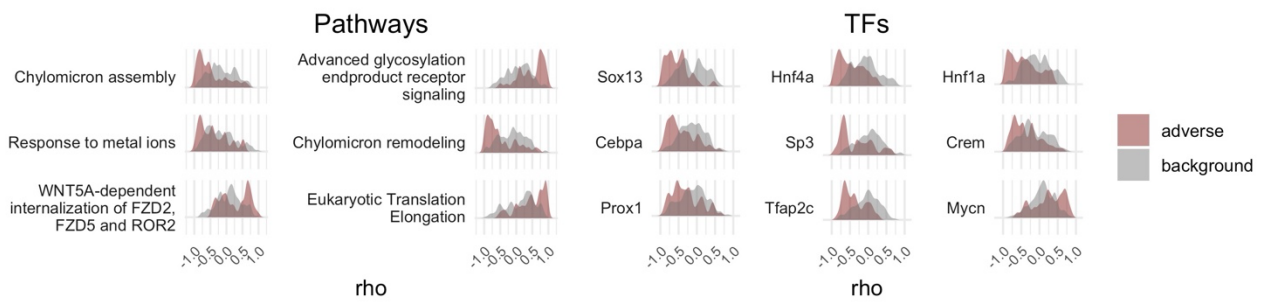

447

448 **Fig 10: Combining time dependence and concordance to identify mechanistically supported**  
 449 **biomarkers.** A) The relation between time concordance, quantified by the enrichment p-value for  
 450 event activation before adverse histopathology, and time dependence, quantified by the meta p-value  
 451 for Spearman correlation between time and event activation across adverse conditions, is shown. B)  
 452 For events with the most significant time-dependence, the distribution of correlation coefficients is  
 453 shown providing further insight into the strength of correlation and consistency across adverse  
 454 conditions.

455 While in general events with highly significant time dependence also showed highly significant time  
 456 concordance, some exceptions were found in which only one of both was highly significant. For  
 457 instance, the pathway with the 2<sup>nd</sup> most significant time-dependence (p-value < 10<sup>44</sup>) is signaling via  
 458 advanced glycosylation end product receptor (RAGE) which contributes to inflammation and oxidative  
 459 stress generation and did not pass the significance threshold for time concordance (p-value = 0.058).  
 460 RAGE expression and activity, which are both induced by binding of RAGE ligands, are thereby  
 461 known to be up-regulated in various hepatic disorders resulting in a positive feedback loop explaining

462 increasing or sustained RAGE activation [59]. This indicates that, while RAGE signaling is correlated  
463 with progression, there is no clear evidence for a role in early pathogenesis preceding adverse  
464 histopathological changes. In contrast, SUMOylation of TFs, is time-concordant (p-value = 0.002) but  
465 not -dependent (p-value = 0.48) indicating a mechanistic role in early pathogenesis which is not  
466 sustained over time. This aligns with the finely regulated and pleiotropic roles of SUMOylation in post-  
467 transcriptional regulation which have also been found to be involved in the context of liver diseases  
468 [60].

## 469 **Limitations of this study**

470 In this study, we introduce a time-concordance based approach to derive mechanistic insight from  
471 gene expression and histopathology data. We are able to recover known mechanisms in DILI as well  
472 as able to propose novel and detailed mechanistic hypotheses. However, the presented analysis only  
473 describes event cascades in the TG-GATEs dataset and hence is based on a limited number time-  
474 series as well as only few timepoints within each time-series. This does not only mean that rare events  
475 might be missed in the measurements and that small effects might not be identified as significant, but  
476 also that there is potentially a bias based on the tested compounds towards the represented modes  
477 of toxicity.

478 Furthermore, the analysis is limited by how confidently biological processes are inferred from the data.  
479 This was for instance demonstrated by the differences between pathway and TF activation for  
480 signalling and stress response pathways highlighting the discrepancy between protein activation and  
481 gene expression. As only pathways induced through changes in gene expression or their downstream  
482 expression footprints [61] can be confidently detected, this means that good estimates of time  
483 concordance can predominantly be derived for intermediate or later key events while earlier key  
484 events or molecular initiating events, such as drug metabolism, cannot be estimated based on the



485 data. That being said, this is a limitation of gene expression data in general and the time concordance  
486 approach would also be able to integrate other data types describing events not covered yet.

487 Moreover, multiple choices were made to align our analysis to the AOP concept prioritizing  
488 mechanisms supported by prior knowledge over purely data-driven hypothesis. First, detailed insights  
489 might be lost by summarising results to the pathway level. While generally measurements for  
490 individual genes can be noisy, this can be summarised in different ways e.g. based on similarity in  
491 expression profiles [15]. In this study, however, we used curated gene sets due to their interpretability  
492 and to derive modular events as defined in the AOP framework. Additionally, prior knowledge was  
493 taken as ground truth, both in the gene set and interaction analysis, meaning that only generally  
494 known pathways and interactions can be discovered. Like all methods based on curated gene set and  
495 interactions, it is hence informed and biased by the current understanding of biology. However, this  
496 prior biological knowledge contributes to the biological plausibility of the derived events and  
497 relationships contributing to the weight of evidence of our findings in the context of AOPs.

## 498 **Conclusion**

499 In this study, we introduce first activation as concept to quantify the strength of temporal concordance  
500 between events across time series. With this approach, we study gene expression-based TF and  
501 pathway-level events found before adverse histopathology indicating liver injury in repeat-dose  
502 studies in rats from TG-GATEs as a case study. We find some known processes in DILI to be highly  
503 confident, e.g. bile acid recycling, while others are highly frequent but less specific including adaptive  
504 response pathways. Here, the eIF2 $\alpha$ /ATF4 pathway as eIF2 $\alpha$  and Atf4 are identified as most frequent  
505 pathway and TF, pointing to an important role of eIF2 $\alpha$ /ATF4-mediated stress response [37].

506 Beyond quantifying time concordance for known and potentially novel events in DILI, we additionally  
507 show how time concordance can be combined with prior biological knowledge to generate hypothesis  
508 on potentially causal gene-regulatory cascades in DILI. Amongst others, this identifies LXR $\alpha$  down-

509 regulation leading to decreased Srebf1 expression, an interaction known to regulate fatty acid  
510 synthesis in the liver [28], but also characterizes yet unknown TFs based on their time concordance,  
511 their mode of regulation (either transcriptional or post-transcriptional) and potential upstream  
512 regulators and downstream effectors. One of the identified induced TFs is Meis1 which is supported  
513 by significantly enriched decrease in expression and activity before adverse histopathology, as well  
514 as upstream regulators which also show significant enrichment of regulon activity and are found within  
515 the same time series. On top of time concordance, we also derive each event's time dependence and  
516 show that events mechanistically involved in early pathogenesis do not necessarily reflect disease  
517 progression and vice versa. However, for some events, e.g. Sox13, both properties are found and  
518 these may be useful biomarkers which reflect injury progression and already change preceding  
519 histopathological manifestation.

520 We believe that the described analysis can provide supporting evidence for mechanistic links between  
521 events in line with the evolved Bradford-Hill considerations and can hence e.g. support AOP  
522 development. Furthermore, the approach is not limited to a particular adverse event and can instead  
523 quantify the interaction between any two events represented in time series in a data-driven and  
524 automatable fashion. We make the results of our analysis on the TG-GATES *in vivo* liver data publicly  
525 available in a Shiny app through which users can query the most time-concordant events for more  
526 specific types of histopathology and study in detail in which time series time concordance was  
527 observed or not observed ([https://github.com/anikaliu/DILICascades\\_App](https://github.com/anikaliu/DILICascades_App)).

## 528 **Methods**

### 529 **Open TG-GATES data processing**

530 The TG-GATES gene expression data from repeat-dose studies in rats was downloaded from the Life  
531 Science Data Archive (DOI: 10.18908/lbdba.nbdc00954-01-000). The raw liver gene expression

532 levels were background corrected,  $\log_2$  transformed, and quantile normalized with the rma function of  
533 the affy package per treatment across all doses and timepoints [62]. Quality control was then  
534 performed using the ArrayQualityMetrics package [63] and detected outliers with high distance to  
535 other experiments or unusual signal distribution were removed (List of removed outliers summarised  
536 in S1 File). The platform information for the Affymetrix Rat Genome 230 2.0 Array was derived from  
537 Gene Expression Omnibus [64] (GEO accession: GPL1355) and was then used to summarise probe  
538 IDs to rat gene symbols by median for all probes mapping uniquely to one gene symbol. Only  
539 compound-dose combinations with at least 5 measured timepoints after quality control were included.

## 540 **Definition of adverse histopathology**

541 To characterize the extend of histological findings, we used the toxscores by Sutherland et al. [15] in  
542 order to consider both severity and frequency of events in a single numerical output measure. These  
543 are based on the lesion severity per animal which was first converted to a numerical scale (normal =  
544 0, minimal = 1, slight = 2, moderate = 3, marked or severe = 4) and then summarised across all  
545 biological replicates by mean as an aggregate measure for lesion frequency and severity. One  
546 characteristic of this measure is that the overall distributions varied between different findings, e.g.  
547 inflammation was more frequently annotated with low than with high toxscores while a more balanced  
548 distribution of scores was observed for Hepatocellular single cell necrosis (S1 Fig).

549 To study which histological findings were enriched in adverse conditions, we first defined binary  
550 histopathology labels describing the presence of histological findings with different extents in each  
551 time-series. Based on the toxscore ranges used by Sutherland et al., three toxscore cut-offs are  
552 implemented to describe each histopathological finding “Null” (toxscore > 0), “low” (toxscore > 0.67)  
553 and “high” (toxscore > 1.34). We then studied which labels were over-represented in adverse time-  
554 series. These were defined using the annotation of Sutherland et al., where pathologists classified  
555 compound-dose combinations in the TG-GATEs database as adverse or non-adverse after 4 and 29

556 days of treatment. We used the 29 days classification to define 40 adverse time series and only  
557 regarded time-series as non-adverse for compounds which were not classified as adverse at any  
558 dose in the negative control, in order to account for the fact that some of the cellular changes of  
559 interest might already take place at lower doses, although the resulting phenotype is not considered  
560 adverse yet. Out of the 24 compounds represented in adverse time-series, 14 have additionally been  
561 classified as hepatotoxic in DIL1st and 5 are classified as vMost-DILI-Concern in DIL1rank (S2 Table).

562 We defined findings as adverse histopathology if they are observed in at least 5 out of 40 adverse  
563 time-series to remove rare histopathological findings, and additionally require that at least 50% of  
564 findings are in adverse conditions to remove findings which are unspecific. All labels which were  
565 identified with these criteria are significantly enriched using a hypergeometric test ( $p\text{-value} > 0.0001$ ),  
566 however, this combination of additional criteria was chosen to exclude findings which are rare or  
567 weakly associated.

## 568 **Pathway and TF activity inference**

569 The activity of pathways and TFs was derived for each compound based on the expression of its gene  
570 sets members using GSVA [65] using a Gaussian kernel and requiring at least 5 genes per gene set.  
571 As prior knowledge, we used pathway maps from Reactome [66] which were derived through MSigDB  
572 [67] and the msigdbR package [68]. TF activity gene sets were derived from DoRothEA [69] and  
573 mapped from human to rat gene symbols with biomaRt [70]. These gene sets describe known,  
574 functional TF-gene interactions and are assigned a confidence level based on the strength of  
575 evidence of these interactions. Thereby, only the 207 TFs with a high to medium confidence level of  
576 A-C were included and the few TF-gene interactions with a negative mode of regulation were removed  
577 to better infer TF directionality. To evaluate which pathway or TF is dysregulated, we computed the  
578 differential activity in comparison to the time-, vehicle-, and experiment-matched control group using  
579 limma [71] and identify significantly dysregulated gene sets ( $FDR < 0.05$ ).

## 580 **Temporal concordance of events**

581 In this study, the order of events was derived based on each event's timepoint of first activation within  
582 each time-series (Fig 1A). For pathways and TFs, we defined first activation as the earliest time of  
583 measurement at which significant differential regulation was observed (FDR < 0.05) in each direction,  
584 while an additional logFC cut-off has been implemented for individual genes. As first evidence of  
585 adverse morphological changes in the liver, we used the first timepoint any of the adverse  
586 histopathology label derived before were found.

587 We were then generally interested in events of interest **A** which are first activated before or at the  
588 same time as an anchoring event **B** and used multiple metrics to quantify the degree of time  
589 concordance which can be related to the original work by Bradford Hill (Table 1). Thereby, the key  
590 anchoring event in this study was adverse histopathology but we used a more general notation **B** as  
591 some of the following criteria to quantify time concordance are also applied in the TF analysis where  
592 gene expression-derived events are used as anchoring event. First, we used the true positive rate  
593 (TPR) which describes how frequently **A** is observed before **B** among all time-series with **B** and hence  
594 its consistency across compounds. Thereby, the reported TPR only included time-series for which  
595 any event of the same type as **A**, e.g. TF or pathway, was observed before or at **B**. Secondly, we use  
596 the maximal effect size of **A** observed before **B**, summarised across time-series by median, to  
597 characterise the strength of association. To evaluate the significance of the findings, we additionally  
598 defined a set of background time-series unrelated to **B** (Fig 1B). For adverse histopathology, these  
599 unrelated background time-series were the 133 time-series without any observed histological  
600 changes. We then computed the enrichment of **A** before or at **B** using a hypergeometric test and  
601 positive predictive value (PPV) of **A** for **B** which describes how likely **B** is observed at the same or a  
602 later time given the observation of **A**.

603 **Table 1: Metrics quantifying the time concordance between a potential preceding event *A* and**  
 604 **potential later event *B*, and their relation to the original Bradford Hill (BH) considerations.**

| BH consideration | Metric                                   | Formula                       | Description                                                                                                                                                           |
|------------------|------------------------------------------|-------------------------------|-----------------------------------------------------------------------------------------------------------------------------------------------------------------------|
| Consistency      | True positive rate (TPR)                 | $p(A \rightarrow B B)$        | Fraction of time series with event <i>A</i> with specified temporal relation among time series with event <i>B</i>                                                    |
| Specificity      | Positive predictive value (PPV)          | $p(A \rightarrow B A)$        | Fraction of time series with event <i>B</i> with specified temporal relation among time series with event <i>A</i>                                                    |
| Temporality      | p-value                                  | One-sided Fisher's Exact test | Likelihood of observing event <i>A</i> and <i>B</i> with specified temporal relation with equal or higher frequency by chance assuming a hypergeometric distribution. |
| Strength         | Effect size in time series with <i>B</i> | Median (logFC)                | Median logFC of <i>A</i> observed in time-series with <i>B</i> (in comparison to vehicle control)                                                                     |

## 605 **Combining time concordance on TF-TF interactions**

606 We used 3 sources of causal prior knowledge to derive mechanistic hypotheses linking TFs: Protein-  
 607 protein interaction between TFs derived from Omnipath through OmnipathR [72,73], TF-target gene  
 608 interactions from DoRothEA [69] and the link between gene expression and protein levels following  
 609 the central dogma of molecular biology. Using these interactions as backbone, we then derived those  
 610 additionally supported by time concordance. Thereby, the dysregulation of the nodes was required to  
 611 match the reported mode of regulation (edge sign) and the source node or upstream event was  
 612 required to be observed in at least 20% of cases before or at the same time as the target node or  
 613 downstream event. For induced TFs, significant enrichment of gene expression ( $|\logFC| > 0.5$ ) and TF  
 614 activity before adverse histopathology was required as well as evidence for changes in expression  
 615 preceding changes in the same direction in regulon activity within the same time series.

## 616 **Time dependence**

617 In each adverse time-series, we tested for Spearman correlation between timepoint and event  
 618 activation logFC using the correlation R package [74], and include a logFC of 0 at timepoint 0 h  
 619 assuming that there are no differences in comparison to the control group before treatment. We then

620 identify pathways and TFs which only show significant Spearman correlation in one direction, positive  
621 or negative. For those events, we apply the Fisher's combined probability test using the metap R  
622 package [75] across all adverse time-series to evaluate whether overall significant correlation  
623 between event activation and time is found.

## 624 **Supporting information**

625 **S1 Table. Comparison of quantitative Adverse Outcome Pathway (qAOP) models.** Comparison  
626 of the first activation concept and other qAOP models with respect to their potential roles in AOP  
627 development.

628 **S2 Table. Compounds classified as adverse based on histopathology and concordance with**  
629 **labels from DILIRank and DIList describing liver side effects observed in humans derived from**  
630 **post-marketing data.**

631 **S3 Table. Time concordance metrics for Reactome pathway maps which map to known key**  
632 **events based on literature review.**

633 **S4 Table. Time concordance metrics for top 10 ranking events by True Positive Rate (TPR),**  
634 **significance and median max. |logFC|.**

635 **S5 Table. TF-TF relations supported by known relations and time concordance.** For TF events  
636 which are significantly enriched before or at adverse histopathology, known interactions supported by  
637 time concordance are shown. With respect to the interaction, the absolute and relative frequency are  
638 shown for how often the source TF was observed "before" or "before or at" downstream TF activity.  
639 Additionally, the source of the interactions provided in Omnipath are shown for protein-protein  
640 interactions and the DoRoThEA confidence level for TF-target gene interactions.

641

642 **S1 Fig. Distribution of toxscores across histopathological findings.**

643 **S2 Fig. Frequency of histopathological findings before and after first adverse histopathology.**  
644 For adverse and non-adverse histopathological findings the frequency before or at first non-adverse  
645 histopathology is shown (left). For adverse findings, this indicates how frequently they were one of  
646 the first adverse histopathological findings given that they cannot occur before by definition. This  
647 identifies single-cell necrosis at any severity ("null"), as the most frequent finding, both in absolute  
648 and relative terms.

649 **S3 Fig. Background distribution of temporal association metrics across events.** The  
650 dependency between different metrics based on the confusion matrix is shown. Hypergeometric tests  
651 to identify events which are significantly enriched before adverse histopathology in comparison to  
652 non-adverse control time series derive low p-values for events with high TPR and high PPV. Given a  
653 number of event activations in non-adverse control time series, there is a monotonous relationship

654 between PPV and TPR with increasing PPV at lower event frequency in non-adverse control time  
655 series.

656 **S1 File. Removed outlier samples.**

657 **S2 File. Time concordance metrics for all TFs, pathways as well as genes using both a minimal**  
658 **|logFC| of 0.5 and 1.**

## 659 **References**

- 660 1. Hwang TJ, Carpenter D, Lauffenburger JC, Wang B, Franklin JM, Kesselheim AS. Failure of  
661 investigational drugs in late-stage clinical development and publication of trial results. *JAMA*  
662 *Internal Medicine*. 2016;176: 1826–1833. doi:10.1001/jamainternmed.2016.6008
- 663 2. Harrison RK. Phase II and phase III failures: 2013-2015. *Nature Reviews Drug Discovery*.  
664 2016;15: 817–818. doi:10.1038/nrd.2016.184
- 665 3. Bai JPF, Abernethy DR. Systems Pharmacology to Predict Drug Toxicity: Integration Across  
666 Levels of Biological Organization \*. 2012 [cited 5 Jun 2019]. doi:10.1146/annurev-pharmtox-  
667 011112-140248
- 668 4. Leist M, Ghallab A, Graepel R, Marchan R, Hassan R, Bennekou SH, et al. Adverse outcome  
669 pathways: opportunities, limitations and open questions. *Archives of Toxicology*. 2017;91:  
670 3477–3505. doi:10.1007/s00204-017-2045-3
- 671 5. Ankley GT, Bennett RS, Erickson RJ, Hoff DJ, Hornung MW, Johnson RD, et al. Adverse  
672 outcome pathways: A conceptual framework to support ecotoxicology research and risk  
673 assessment. *Environmental Toxicology and Chemistry Wiley Blackwell*; Mar 1, 2010 pp. 730–  
674 741. doi:10.1002/etc.34
- 675 6. OECD (Organisation for Economic Co-operation and Development). **USERS' HANDBOOK**  
676 **SUPPLEMENT TO THE GUIDANCE DOCUMENT FOR DEVELOPING AND ASSESSING**



- 677 AOPs. OECD Environment, Health and Safety Publications Series on Testing and Assessment.  
678 2018; 1–62.
- 679 7. Hill AB. The Environment and Disease: Association or Causation? Proceedings of the Royal  
680 Society of Medicine. 1965; 295–300.
- 681 8. Meek ME, Palermo CM, Bachman AN, North CM, Lewis RJ, Meek B, et al. Mode of action  
682 human relevance (species concordance) framework: Evolution of the Bradford Hill  
683 considerations and comparative analysis of weight of evidence. *Journal of Applied Toxicology*  
684 John Wiley and Sons Ltd; 2014 pp. 595–606. doi:10.1002/jat.2984
- 685 9. Oki NO, Nelms MD, Bell SM, Mortensen HM, Edwards SW. Accelerating Adverse Outcome  
686 Pathway Development Using Publicly Available Data Sources. *Current Environmental Health*  
687 *Reports*. 2016;3: 53–63. doi:10.1007/s40572-016-0079-y
- 688 10. Oki NO, Edwards SW. An integrative data mining approach to identifying adverse outcome  
689 pathway signatures. *Toxicology*. 2016;350–352: 49–61. doi:10.1016/J.TOX.2016.04.004
- 690 11. Bell SM, Angrish MM, Wood CE, Edwards SW. Integrating publicly available data to generate  
691 computationally predicted adverse outcome pathways for fatty liver. *Toxicological Sciences*.  
692 2016;150: 510–520. doi:10.1093/toxsci/kfw017
- 693 12. Burgoon LD, Angrish M, Garcia-Reyero N, Pollesch N, Zupanic A, Perkins E. Predicting the  
694 Probability that a Chemical Causes Steatosis Using Adverse Outcome Pathway Bayesian  
695 Networks (AOPBNs). *Risk Analysis*. 2020;40: 512–523. doi:10.1111/risa.13423
- 696 13. Jeong J, Garcia-Reyero N, Burgoon L, Perkins E, Park T, Kim C, et al. Development of Adverse  
697 Outcome Pathway for PPAR $\gamma$ Antagonism Leading to Pulmonary Fibrosis and Chemical  
698 Selection for Its Validation: ToxCast Database and a Deep Learning Artificial Neural Network

- 699 Model-Based Approach. *Chemical Research in Toxicology*. 2019;32: 1212–1222.  
700 doi:10.1021/acs.chemrestox.9b00040
- 701 14. Kohonen P, Parkkinen JA, Willighagen EL, Ceder R, Wennerberg K, Kaski S, et al. A  
702 transcriptomics data-driven gene space accurately predicts liver cytopathology and drug-  
703 induced liver injury. *Nature Communications*. 2017;8. doi:10.1038/ncomms15932
- 704 15. Sutherland JJ, Webster YW, Willy JA, Searfoss GH, Goldstein KM, Irizarry AR, et al.  
705 Toxicogenomic module associations with pathogenesis: A network-based approach to  
706 understanding drug toxicity. *Pharmacogenomics Journal*. 2018;18: 377–390.  
707 doi:10.1038/tpj.2017.17
- 708 16. Souza TM, Kleinjans JCS, Jennen DGJ. Dose and Time Dependencies in Stress Pathway  
709 Responses during Chemical Exposure: Novel Insights from Gene Regulatory Networks.  
710 *Frontiers in Genetics*. 2017;8: 142–142. doi:10.3389/fgene.2017.00142
- 711 17. Rooney J, Hill T, Qin C, Sistare FD, Christopher Corton J. Adverse outcome pathway-driven  
712 identification of rat liver tumorigens in short-term assays. *Toxicology and Applied  
713 Pharmacology*. 2018;356: 99–113. doi:10.1016/j.taap.2018.07.023
- 714 18. Rooney J, Oshida K, Vasani N, Vallanat B, Ryan N, Chorley BN, et al. Activation of Nrf2 in the  
715 liver is associated with stress resistance mediated by suppression of the growth hormone-  
716 regulated STAT5b transcription factor. *PLoS ONE*. 2018;13.  
717 doi:10.1371/journal.pone.0200004
- 718 19. Aguayo-Orozco A, Bois FY, Brunak S, Taboureau O. Analysis of Time-Series Gene Expression  
719 Data to Explore Mechanisms of Chemical-Induced Hepatic Steatosis Toxicity. *Frontiers in  
720 Genetics*. 2018;9: 396. doi:10.3389/fgene.2018.00396

- 721 20. Zhang JD, Berntenis N, Roth A, Ebeling M. Data mining reveals a network of early-response  
722 genes as a consensus signature of drug-induced in vitro and in vivo toxicity.  
723 *Pharmacogenomics Journal*. 2014;14: 208–216. doi:10.1038/tpj.2013.39
- 724 21. Zgheib E, Gao W, Limonciel A, Aladjov H, Yang H, Tebby C, et al. Application of three  
725 approaches for quantitative AOP development to renal toxicity. *Computational Toxicology*.  
726 2019;11: 1–13. doi:10.1016/J.COMTOX.2019.02.001
- 727 22. Hassan I, El-Masri H, Kosian PA, Ford J, Degitz SJ, Gilbert ME. Neurodevelopment and  
728 Thyroid Hormone Synthesis Inhibition in the Rat: Quantitative Understanding Within the  
729 Adverse Outcome Pathway Framework. *Toxicological Sciences*. 2017;160: 57–73.  
730 doi:10.1093/TOXSCI/KFX163
- 731 23. Spinu N, Cronin MTD, Enoch SJ, Madden JC, Worth AP. Quantitative adverse outcome  
732 pathway (qAOP) models for toxicity prediction. *Archives of Toxicology*. Springer; 2020. pp.  
733 1497–1510. doi:10.1007/s00204-020-02774-7
- 734 24. Andrade RJ, Chalasani N, Björnsson ES, Suzuki A, Kullak-Ublick GA, Watkins PB, et al. Drug-  
735 induced liver injury. *Nature Reviews Disease Primers*. 2019;5: 1–22. doi:10.1038/s41572-019-  
736 0105-0
- 737 25. Hong L, Sun QF, Xu TY, Wu YH, Zhang H, Fu RQ, et al. New role and molecular mechanism  
738 of Gadd45a in hepatic Fibrosis. *World Journal of Gastroenterology*. 2016;22: 2779–2788.  
739 doi:10.3748/wjg.v22.i9.2779
- 740 26. Copple IM, Goldring CE, Jenkins RE, Chia AJL, Randle LE, Hayes JD, et al. The hepatotoxic  
741 metabolite of acetaminophen directly activates the Keap1-Nrf2 cell defense system.  
742 *Hepatology*. 2008;48: 1292–1301. doi:10.1002/hep.22472

- 743 27. Luedde T, Schwabe RF. NF- $\kappa$ B in the liver-linking injury, fibrosis and hepatocellular carcinoma.  
744 Nature Reviews Gastroenterology and Hepatology. NIH Public Access; 2011. pp. 108–118.  
745 doi:10.1038/nrgastro.2010.213
- 746 28. Schultz JR, Tu H, Luk A, Repa JJ, Medina JC, Li L, et al. Role of LXRs in control of lipogenesis.  
747 Genes and Development. 2000;14: 2831–2838. doi:10.1101/gad.850400
- 748 29. Hetz C, Zhang K, Kaufman RJ. Mechanisms, regulation and functions of the unfolded protein  
749 response. Nature Reviews Molecular Cell Biology. Nature Research; 2020. pp. 421–438.  
750 doi:10.1038/s41580-020-0250-z
- 751 30. Wijaya LS, Trairatphisan P, Gabor A, Niemeijer M, Keet J, Alcalà Morera A, et al. Integration  
752 of temporal single cell cellular stress response activity with logic-ODE modeling reveals  
753 activation of ATF4-CHOP axis as a critical predictor of drug-induced liver injury. Biochemical  
754 Pharmacology. 2021;190: 114591. doi:10.1016/j.bcp.2021.114591
- 755 31. Fredriksson L, Wink S, Herpers B, Benedetti G, Hadi M, de Bont H, et al. Drug-induced  
756 endoplasmic reticulum and oxidative stress responses independently sensitize toward TNF $\alpha$ -  
757 mediated hepatotoxicity. Toxicological Sciences. 2014;140: 144–159.  
758 doi:10.1093/toxsci/kfu072
- 759 32. Seki E, Brenner DA, Karin M. A liver full of JNK: Signaling in regulation of cell function and  
760 disease pathogenesis, and clinical approaches. Gastroenterology. 2012;143: 307–320.  
761 doi:10.1053/j.gastro.2012.06.004
- 762 33. Win S, Than TA, Zhang J, Oo C, Min RWM, Kaplowitz N. New insights into the role and  
763 mechanism of c-Jun-N-terminal kinase signaling in the pathobiology of liver diseases.  
764 Hepatology. John Wiley and Sons Inc.; 2018. pp. 2013–2024. doi:10.1002/hep.29689

- 765 34. Simmons SO, Fan C-Y, Ramabhadran R. Cellular Stress Response Pathway System as a  
766 Sentinel Ensemble in Toxicological Screening. *Toxicological Sciences*. 2009;111: 202–225.  
767 doi:10.1093/TOXSCI/KFP140
- 768 35. Wong MMK, Joyson SM, Hermeking H, Chiu SK. Transcription factor AP4 mediates cell fate  
769 decisions: To divide, age, or die. *Cancers*. MDPI AG; 2021. pp. 1–15.  
770 doi:10.3390/cancers13040676
- 771 36. Delgado I, Fresnedo O, Iglesias A, Rueda Y, Syn WK, Zubiaga AM, et al. A role for transcription  
772 factor E2F2 in hepatocyte proliferation and timely liver regeneration. *American Journal of*  
773 *Physiology - Gastrointestinal and Liver Physiology*. 2011;301. doi:10.1152/ajpgi.00481.2010
- 774 37. B'Chir W, Maurin AC, Carraro V, Averous J, Jousse C, Muranishi Y, et al. The eIF2 $\alpha$ /ATF4  
775 pathway is essential for stress-induced autophagy gene expression. *Nucleic Acids Research*.  
776 2013;41: 7683–7699. doi:10.1093/nar/gkt563
- 777 38. Pavel M, Imarisio S, Menzies FM, Jimenez-Sanchez M, Siddiqi FH, Wu X, et al. CCT complex  
778 restricts neuropathogenic protein aggregation via autophagy. *Nature Communications*. 2016;7:  
779 1–18. doi:10.1038/ncomms13821
- 780 39. Grantham J. The Molecular Chaperone CCT/TRiC: An Essential Component of Proteostasis  
781 and a Potential Modulator of Protein Aggregation. *Frontiers in Genetics*. Frontiers Media S.A.;  
782 2020. doi:10.3389/fgene.2020.00172
- 783 40. Reebye V, Huang KW, Lin V, Jarvis S, Cutilas P, Dorman S, et al. Gene activation of CEBPA  
784 using saRNA: Preclinical studies of the first in human saRNA drug candidate for liver cancer.  
785 *Oncogene*. 2018;37: 3216–3228. doi:10.1038/s41388-018-0126-2
- 786 41. Fusakio ME, Willy JA, Wang Y, Mirek ET, Baghdadi RJTA, Adams CM, et al. Transcription  
787 factor ATF4 directs basal and stress-induced gene expression in the unfolded protein response

- 788 and cholesterol metabolism in the liver. *Molecular Biology of the Cell*. 2016;27: 1536–1551.  
789 doi:10.1091/mbc.E16-01-0039
- 790 42. Hao L, Zhong W, Dong H, Guo W, Sun X, Zhang W, et al. ATF4 activation promotes hepatic  
791 mitochondrial dysfunction by repressing NRF1-TFAM signalling in alcoholic steatohepatitis.  
792 *Gut*. 2020 [cited 6 May 2021]. doi:10.1136/gutjnl-2020-321548
- 793 43. Larigot L, Juricek L, Dairou J, Coumoul X. AhR signaling pathways and regulatory functions.  
794 *Biochimie Open*. 2018;7: 1–9. doi:10.1016/J.BIOPEN.2018.05.001
- 795 44. Yoshikawa T, Ide T, Shimano H, Yahagi N, Amemiya-Kudo M, Matsuzaka T, et al. Cross-talk  
796 between peroxisome proliferator-activated receptor (PPAR)  $\alpha$  and liver X receptor (LXR) in  
797 nutritional regulation of fatty acid metabolism. I. PPARs suppress sterol regulatory element  
798 binding protein-1c promoter through inhibition of LXR signaling. *Molecular Endocrinology*.  
799 2003;17: 1240–1254. doi:10.1210/ME.2002-0190
- 800 45. T Y, H S, M A-K, N Y, AH H, T M, et al. Identification of liver X receptor-retinoid X receptor as  
801 an activator of the sterol regulatory element-binding protein 1c gene promoter. *Molecular and*  
802 *cellular biology*. 2001;21: 2991–3000. doi:10.1128/MCB.21.9.2991-3000.2001
- 803 46. M B, TÃ P, B G, SJ van H, D H, C B, et al. Genome-wide profiling of liver X receptor, retinoid  
804 X receptor, and peroxisome proliferator-activated receptor  $\alpha$  in mouse liver reveals extensive  
805 sharing of binding sites. *Molecular and cellular biology*. 2012;32: 852–867.  
806 doi:10.1128/MCB.06175-11
- 807 47. Kusumanchi P, Liang T, Zhang T, Ross RA, Han S, Chandler K, et al. Stress-Responsive Gene  
808 FK506-Binding Protein 51 Mediates Alcohol-Induced Liver Injury Through the Hippo Pathway  
809 and Chemokine (C-X-C Motif) Ligand 1 Signaling. *Hepatology*. 2021 [cited 6 Sep 2021].  
810 doi:10.1002/HEP.31800

- 811 48. Manmadhan S, Ehmer U. Hippo Signaling in the Liver – A Long and Ever-Expanding Story.  
812 Frontiers in Cell and Developmental Biology. 2019;7: 33. doi:10.3389/FCELL.2019.00033
- 813 49. Kymizi I, Hatzis P, Katrakili N, Tronche F, Gonzalez FJ, Talianidis I. Plasticity and expanding  
814 complexity of the hepatic transcription factor network during liver development. Genes and  
815 Development. 2006;20: 2293–2305. doi:10.1101/GAD.390906
- 816 50. Nishikawa T, Bell A, Brooks JM, Setoyama K, Melis M, Han B, et al. Resetting the transcription  
817 factor network reverses terminal chronic hepatic failure. The Journal of Clinical Investigation.  
818 2015;125: 1533. doi:10.1172/JCI73137
- 819 51. Farooque U, Lohano AK, Dahri Q, Arain N, Farukhuddin F, Khadke C, et al. The Pattern of  
820 Dyslipidemia in Chronic Liver Disease Patients. Cureus. 2021;13.  
821 doi:10.7759/CUREUS.13259
- 822 52. Oliva L, D’Inca R, Medici V, Sturniolo GC. Metallothioneins and liver diseases. Metallothioneins  
823 in Biochemistry and Pathology. 2008; 289–316. doi:10.1142/9789812778949\_0014
- 824 53. Huang G-W, Yang L-Y. Metallothionein expression in hepatocellular carcinoma. World Journal  
825 of Gastroenterology. 2002;8: 650. doi:10.3748/WJG.V8.I4.650
- 826 54. Devisscher L, Campenhout S van, Lefere S, Raevens S, Tilleman L, Nieuwerburgh F van, et  
827 al. Metallothioneins alter macrophage phenotype and represent novel therapeutic targets for  
828 acetaminophen-induced liver injury. Journal of Leukocyte Biology. 2021; 1–11.  
829 doi:10.1002/JLB.3A0820-527R
- 830 55. Lefebvre V. The SoxD transcription factors – Sox5, Sox6, and Sox13 – are key cell fate  
831 modulators. The International Journal of Biochemistry & Cell Biology. 2010;42: 429–432.  
832 doi:10.1016/J.BIOCEL.2009.07.016

- 833 56. Wang Y, Ristevski S, Harley VR. SOX13 Exhibits a Distinct Spatial and Temporal Expression  
834 Pattern During Chondrogenesis, Neurogenesis, and Limb Development:  
835 <http://dx.doi.org/10.1369/jhc6A69232006>. 2006;54: 1327–1333.  
836 doi:10.1369/JHC.6A6923.2006
- 837 57. Liu L, Yannam GR, Nishikawa T, Yamamoto T, Basma H, Ito R, et al. The microenvironment  
838 in hepatocyte regeneration and function in rats with advanced cirrhosis. *Hepatology*. 2012;55:  
839 1529–1539. doi:10.1002/HEP.24815
- 840 58. Guzman-Lepe J, Cervantes-Alvarez E, l'Hortet AC de, Wang Y, Mars WM, Oda Y, et al. Liver-  
841 enriched transcription factor expression relates to chronic hepatic failure in humans.  
842 *Hepatology Communications*. 2018;2: 582–594. doi:10.1002/HEP4.1172
- 843 59. Yamagishi S, Matsui T. Role of receptor for advanced glycation end products (RAGE) in liver  
844 disease. *European Journal of Medical Research*. 2015;20. doi:10.1186/S40001-015-0090-Z
- 845 60. Zeng M, Liu W, Hu Y, Fu N. Sumoylation in liver disease. *Clinica Chimica Acta*. 2020;510: 347–  
846 353. doi:10.1016/J.CCA.2020.07.044
- 847 61. Garcia-Alonso L, Holland CH, Ibrahim MM, Turei D, Saez-Rodriguez J. Benchmark and  
848 integration of resources for the estimation of human transcription factor activities. *Genome*  
849 *Research*. 2019;29: 1363–1375. doi:10.1101/gr.240663.118
- 850 62. Gautier L, Cope L, Bolstad BM, Irizarry RA. Affy - Analysis of Affymetrix GeneChip data at the  
851 probe level. *Bioinformatics*. 2004;20: 307–315. doi:10.1093/bioinformatics/btg405
- 852 63. Kauffmann A, Gentleman R, Huber W. arrayQualityMetrics - A bioconductor package for quality  
853 assessment of microarray data. *Bioinformatics*. 2009;25: 415–416.  
854 doi:10.1093/bioinformatics/btn647



- 855 64. Edgar R, Domrachev M, Lash AE. Gene Expression Omnibus: NCBI gene expression and  
856 hybridization array data repository. *Nucleic Acids Research*. 2002;30: 207–210.  
857 doi:10.1093/nar/30.1.207
- 858 65. Hänzelmann S, Castelo R, Guinney J. GSEA: gene set variation analysis for microarray and  
859 RNA-Seq data. *BMC Bioinformatics*. 2013.
- 860 66. Fabregat A, Jupe S, Matthews L, Sidiropoulos K, Gillespie M, Garapati P, et al. The Reactome  
861 Pathway Knowledgebase. *Nucleic Acids Research*. 2018;46: D649–D655.  
862 doi:10.1093/nar/gkx1132
- 863 67. Liberzon A, Subramanian A, Pinchback R, Thorvaldsdóttir H, Tamayo P, Mesirov JP. Molecular  
864 signatures database (MSigDB) 3.0. *Bioinformatics*. 2011;27: 1739–1740.  
865 doi:10.1093/bioinformatics/btr260
- 866 68. Dolgalev I. msigbr: MSigDB Gene Sets for Multiple Organisms in a Tidy Data Format. 2020.
- 867 69. Garcia-Alonso L, Ibrahim MM, Turei D, Saez-Rodriguez J. Benchmark and integration of  
868 resources for the estimation of human transcription factor activities. *bioRxiv*. 2018; 337915.  
869 doi:10.1101/337915
- 870 70. Smedley D, Haider S, Durinck S, Pandini L, Provero P, Allen J, et al. The BioMart community  
871 portal: an innovative alternative to large, centralized data repositories. *Nucleic Acids Research*.  
872 2015;43: W589–W598. doi:10.1093/nar/gkv350
- 873 71. Ritchie ME, Phipson B, Wu D, Hu Y, Law CW, Shi W, et al. Limma powers differential  
874 expression analyses for RNA-sequencing and microarray studies. *Nucleic Acids Research*.  
875 2015;43: e47. doi:10.1093/nar/gkv007

- 876 72. Türei D, Korcsmáros T, Saez-Rodriguez J. OmniPath: Guidelines and gateway for literature-  
877 curated signaling pathway resources. *Nature Methods*. 2016;13: 966–967.  
878 doi:10.1038/nmeth.4077
- 879 73. Türei D, Valdeolivas A, Gul L, Palacio-Escat N, Klein M, Ivanova O, et al. Integrated intra- and  
880 intercellular signaling knowledge for multicellular omics analysis. *Molecular Systems Biology*.  
881 2021;17: e9923. doi:10.15252/msb.20209923
- 882 74. Makowski D, Ben-Shachar MS, Patil I, Lüdecke D. Methods and Algorithms for Correlation  
883 Analysis in R. *Journal of Open Source Software*. 2020;5: 2306. doi:10.21105/JOSS.02306
- 884 75. Dewey M. *metap: meta-analysis of significance values*. 2020.
- 885
